# Supplementary material for: Facile synthesis of diverse transition metal oxide nanoparticles and electrochemical properties
Source: Royal Society of Chemistry journal article supplement (doi:10.1039/c6qi00096g), 2016-01-01
Supplement: c6qi00096g1.pdf [file c6qi00096g1.pdf]

## Facile Synthesis of Diverse Transition Metal Oxides Nanoparticles and Electrochemical Properties

Hao Zhang<sup>a</sup>, Xiaofeng Wang<sup>a</sup>, Chengcheng Chen<sup>a</sup>, Cuihua An<sup>a</sup>, Yanan Xu<sup>a</sup>, Yanying

Dong<sup>a</sup>, Qiuyu Zhang<sup>a</sup>, Yijing Wang<sup>a, b, \*</sup>, Lifang Jiao<sup>a</sup> and Huatang Yuan<sup>a</sup>

<sup>a</sup>College of Chemistry, Key Laboratory of Advanced Energy Materials Chemistry (MOE), Nankai University, Tianjin 300071 ( P. R. China)

<sup>b</sup>Collaborative Innovation Center of Chemical Science and Engineering (Tianjin), Tianjin 300071 ( P. R. China)

Corresponding author: E-mail: wangyj@nankai.edu.cn; Fax: +86 22 23503639.

**Figure S1.** XRD patterns of as-prepared manganese oxides with different reaction time

**Table S1.** The basic condition of as-prepared nanoparticles.

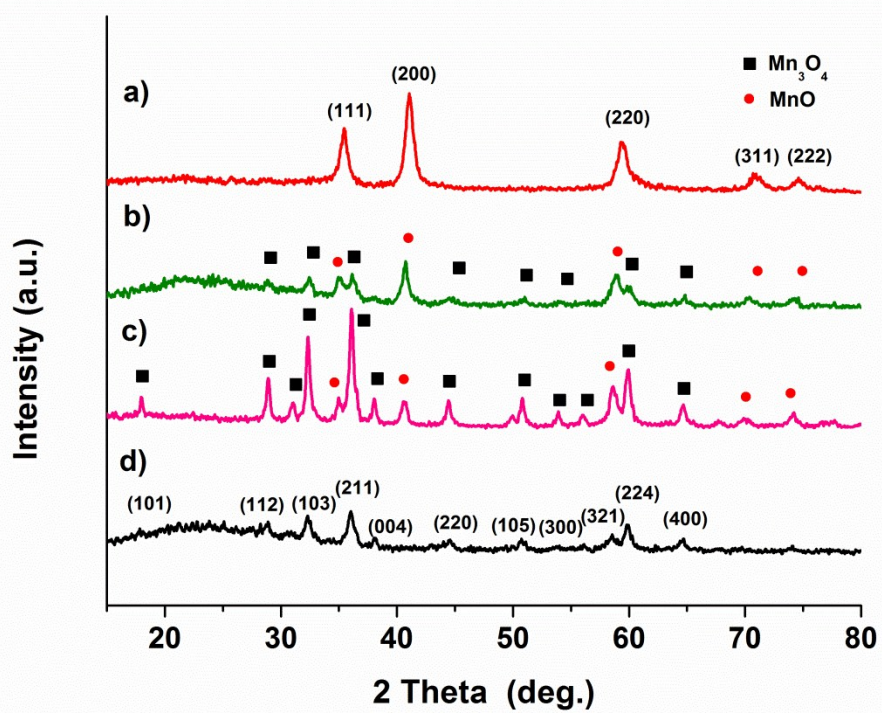

**Figure S1.** XRD patterns of as-prepared manganese oxides with different reaction time.

**Table S1.** The basic condition of as-prepared nanoparticles.

| Substances | Morphology   | Reaction Time | PDF Number | System     | HRTEM                                                                               | Sketch                                                                              |
|------------|--------------|---------------|------------|------------|-------------------------------------------------------------------------------------|-------------------------------------------------------------------------------------|
| $Mn_3O_4$  | Nano-capsule | 1 min         | 18-803     | Tetragonal |  |  |
| $Fe_3O_4$  | Quantum dot  | 3 h           | 2-1035     | Cubic      |  |  |
| CoO        | Nano-Cube    | 12 h          | 48-1719    | Cubic      |  |  |
| NiO        | Nano-flower  | 12 h          | 78-423     | Cubic      |  |  |
